# Supplementary material for: Impact of Recommended Maternal Vaccination Programs on the Clinical Presentation of SARS-CoV-2 Infection: A Prospective Observational Study
Source: Preprints.org preprint supplement (doi:10.20944/preprints202012.0709.v1), 2020-12-28
Supplement: Supplementary file 1 [file supplementary]

**Table S1.** List of hospitals included in the study (n=78).

| **HOSPITAL** |
| --- |
| AGSE Hospital Axarquia |
| Complejo Asistencial de León |
| Complejo Hospitalario A Coruña |
| Complejo Hospitalario de Jaén |
| Complejo Hospitalario San Millán y San Pedro |
| Complejo Hospitalario Universitario de Pontevedra |
| Complexo Hospitalario Universitario de Ourense |
| HM Hospital Nuevo Belén |
| Hospital Alto Guadalquivir |
| Hospital Álvaro Cunqueiro (CHUVI) |
| Hospital Arnau de Vilanova |
| Hospital Clínico de Santiago de Compostela |
| Hospital Clínico San Carlos |
| Hospital Clínico San Cecilio (Complejo Hospitalario Universitario de Granada) |
| Hospital Clínico Universitario de Valladolid |
| Hospital Clínico Universitario Virgen de la Arrixaca |
| Hospital Costa del Sol |
| Hospital d'Inca |
| Hospital de la Santa Creu i Sant Pau |
| Hospital de Poniente |
| Hospital de Santa Caterina |
| Hospital de Son Llàtzer |
| Hospital de Torrejón |
| Hospital de Vinalopó |
| Hospital del Mar |
| Hospital del Tajo |
| Hospital do Barbanza |
| Hospital Doce de Octubre |
| Hospital Donostia |
| Hospital General de L’Hospitalet |
| Hospital General La Mancha Centro |
| Hospital General Universitario de Ciudad Real |
| Hospital General Universitario Gregorio Marañón |
| Hospital General Universitario Santa Lucía |
| Hospital Infanta Margarita |
| Hospital Jerez de la Frontera |
| Hospital La Fe |
| Hospital La Línea |
| Hospital Parc Taulí |
| Hospital Puerta de Hierro |
| Hospital Quirón Pozuelo de Alarcón |
| Hospital Quirónsalud Málaga |
| Hospital Rafael Méndez |
| Hospital Regional Universitario de Málaga |
| Hospital Reina Sofía |
| Hospital San Pedro Alcántara |
| Hospital Sant Joan de Reus |
| Hospital Santa Ana |
| Hospital Universitari Dexeus - Grupo Quirónsalud |
| Hospital Universitari Germans Trias i Pujol |
| Hospital Universitario Araba-Txagorritxu |
| Hospital Universitario Central de Asturias |
| Hospital Universitario de Basurto |
| Hospital Universitario de Burgos |
| Hospital Universitario de Cabueñes |
| Hospital Universitario de Ceuta |
| Hospital Universitario de Ferrol |
| Hospital Universitario de Fuenlabrada |
| Hospital Universitario de Girona Doctor Josep Trueta |
| Hospital Universitario de Salamanca |
| Hospital Universitario de Tarragona Juan XXIII |
| Hospital Universitario de Torrevieja |
| Hospital Universitario Doctor Peset |
| Hospital Universitario Infanta Sofía |
| Hospital Universitario La Paz |
| Hospital Universitario Puerta del Mar |
| Hospital Universitario Río Hortega |
| Hospital Universitario Son Espases |
| Hospital Universitario Torrecárdenas |
| Hospital Universitario Virgen de las Nieves |
| Hospital Universitario Virgen de Valme |
| Hospital Universitario Virgen del Rocio |
| Hospital Universitario Virgen Macarena |
| Hospital Univesitario de Getafe |
| Hospital Univesitario Severo Ochoa |
| Hospital Viamed Santa Ángela de la Cruz |
| Hospital Virgen de la Concha |
| Hospital Virgen de la Luz |
